# Supplementary material
Source: Frontiers journal article supplement (https://www.frontiersin.org/articles/181460)
Supplement: Image_4.PDF [file Image_4.PDF]

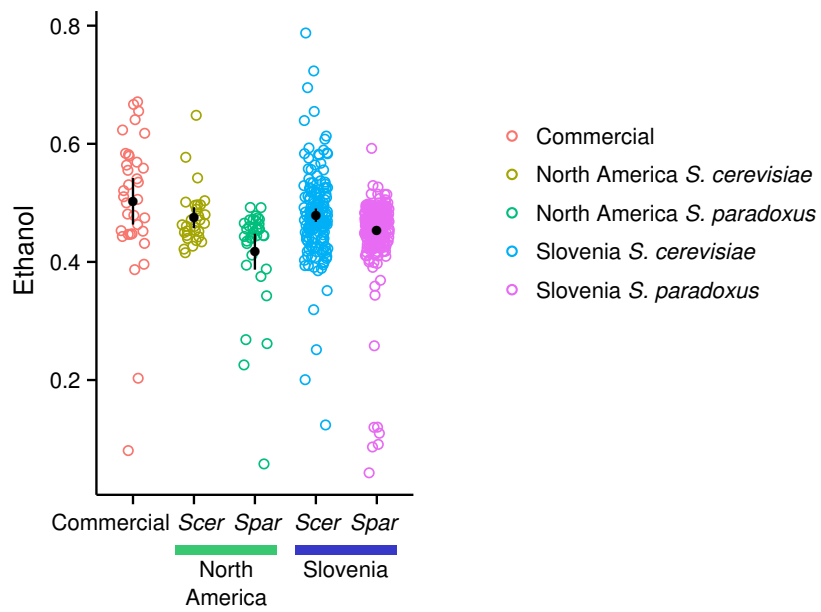

Figure S4. Slovenian and North American strains' resistance to ethanol. Growth rates (AUC) in the presence of ethanol relative to its absence. Black circles and bars represent the mean and its 95% confidence interval.
